# Supplementary material for: Composite Dissolving Microneedles for Coordinated Control of Antigen and Adjuvant Delivery Kinetics in Transcutaneous Vaccination
Source: PubMed Central journal article supplement (PMC3595545; doi:10.1002/adfm.201201512), 2012-08-23
Supplement: NIHMS442012-supplement-supplement_1.pdf [file NIHMS442012-supplement-supplement_1.pdf]

Supporting Information should be included here (for submission only; for publication, please provide Supporting Information as a separate PDF file).

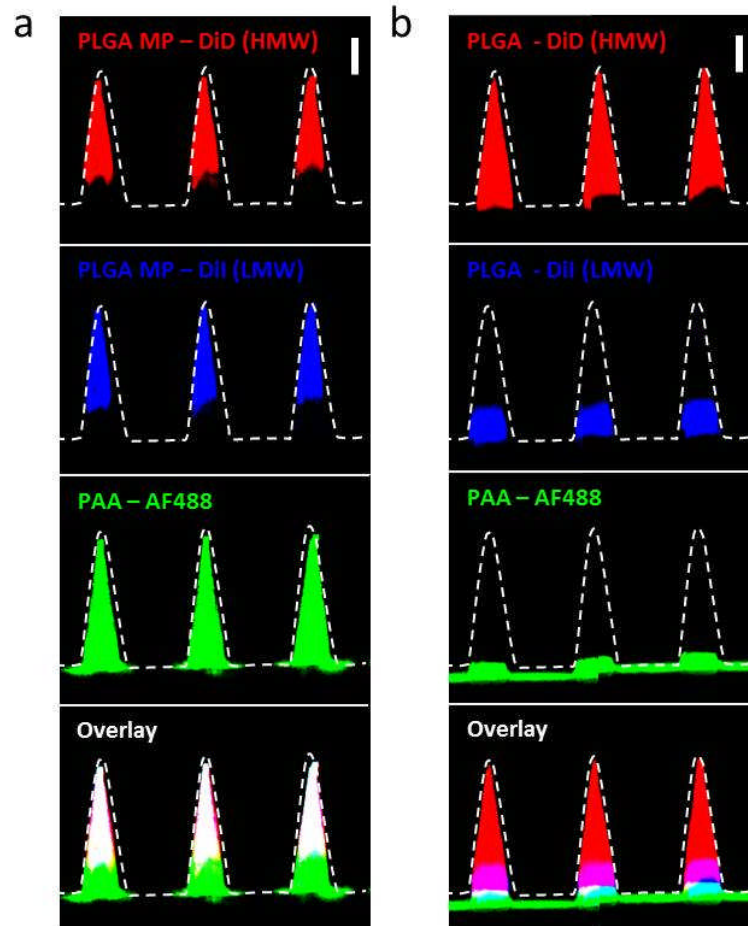

**Figure S1.** a) Confocal micrographs of PLGA-PAA composite microneedles fabricated to encapsulate both DiD- and DiI-loaded PLGA microparticles of high molecular weight (HWM) or low molecular weight (LMW) respectively (right, scale bar 200  $\mu\text{m}$ ) b) Confocal micrographs of resulting PLGA-PAA composite microneedles fabricated to encapsulate a layered DiI/DiD-loaded PLGA tip implant (scale bar 200  $\mu\text{m}$ ). DiD and DiI were encapsulated in PLGA microparticles synthesized from PLGA with IV 0.35 (LMW) or 0.70 (HMW).



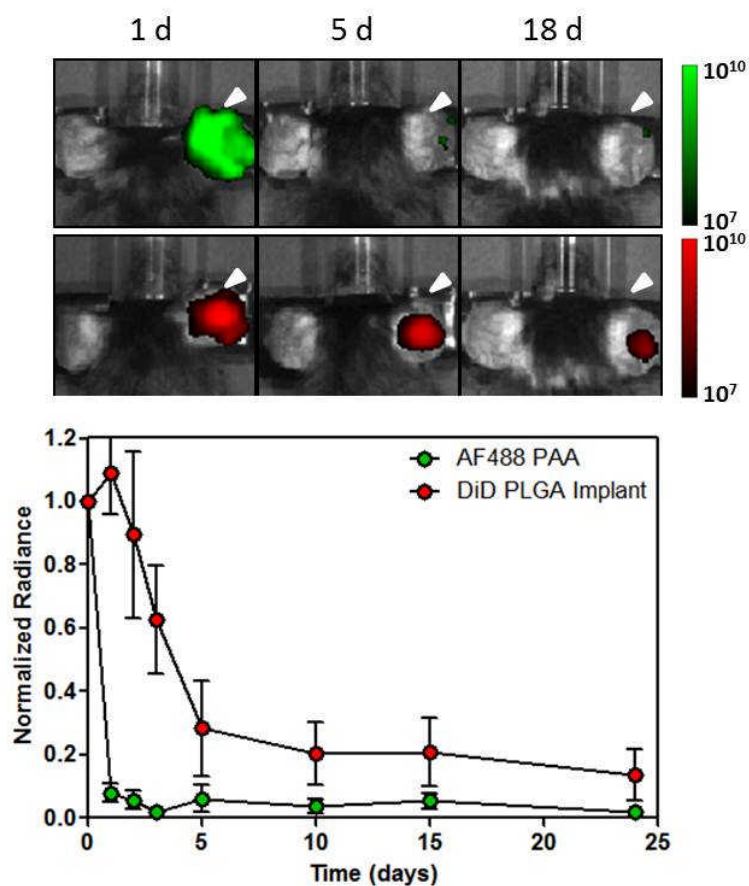

**Figure S3.** a) Whole animal fluorescence imaging of mice treated with DiD-loaded solid PLGA tip microneedles with AF488-loaded PAA pedestals after 1, 5, and 18 days. Fluorescence signal from AF488-PAA and DiD-PLGA implants is shown. b) Quantification of relative fluorescent signal detected at microneedle application site for bulk implant delivery.
